# Supplementary material for: Multiplexed fluidic circuit board for controlled perfusion of 3D blood vessels-on-a-chip
Source: PubMed Central journal article supplement (PMC9764810; doi:10.1039/d2lc00686c), 2022-12-09
Supplement: LC-023-D2LC00686C-s001.pdf [file LC-023-D2LC00686C-s001.pdf]

1 **Electronic supplementary information**

2 **Multiplexed fluidic circuit board for controlled perfusion of 3D**

3 **blood vessels-on-a-chip**

4

5 Mees N. S. de Graaf<sup>1</sup>, Aisen Vivas<sup>2,3</sup>, Dhanesh G. Kasi<sup>1,4,5</sup>,

6 Francijna E. van den Hil<sup>1</sup>, Albert van den Berg<sup>3</sup>, Andries D. van der Meer<sup>2</sup>,

7 Christine L. Mummery<sup>1,2</sup>, Valeria V. Orlova<sup>1\*</sup>

8 <sup>1</sup> Department of Anatomy and Embryology, Leiden University Medical Center,

9 2333 ZA Leiden, The Netherlands

10 <sup>2</sup> Applied Stem Cell Technologies, 7500AE Enschede, University of

11 Twente, The Netherlands

12 <sup>3</sup> BIOS Lab on a Chip Group, MESA+ Institute for Nanotechnology,

13 Technical Medical Centre, Max Planck Institute for Complex Fluid

14 Dynamics, University of Twente, 7500AE Enschede, The Netherlands

15 <sup>4</sup> Department of Human Genetics, Leiden University Medical Center,

16 2333 ZA Leiden, The Netherlands

17 <sup>5</sup> Department of Neurology, Leiden University Medical Center,

18 2333 ZA Leiden, The Netherlands

19

20 \*Corresponding author e-mail address: [v.orlova@lumc.nl](mailto:v.orlova@lumc.nl)

21 **Supplementary Figures**

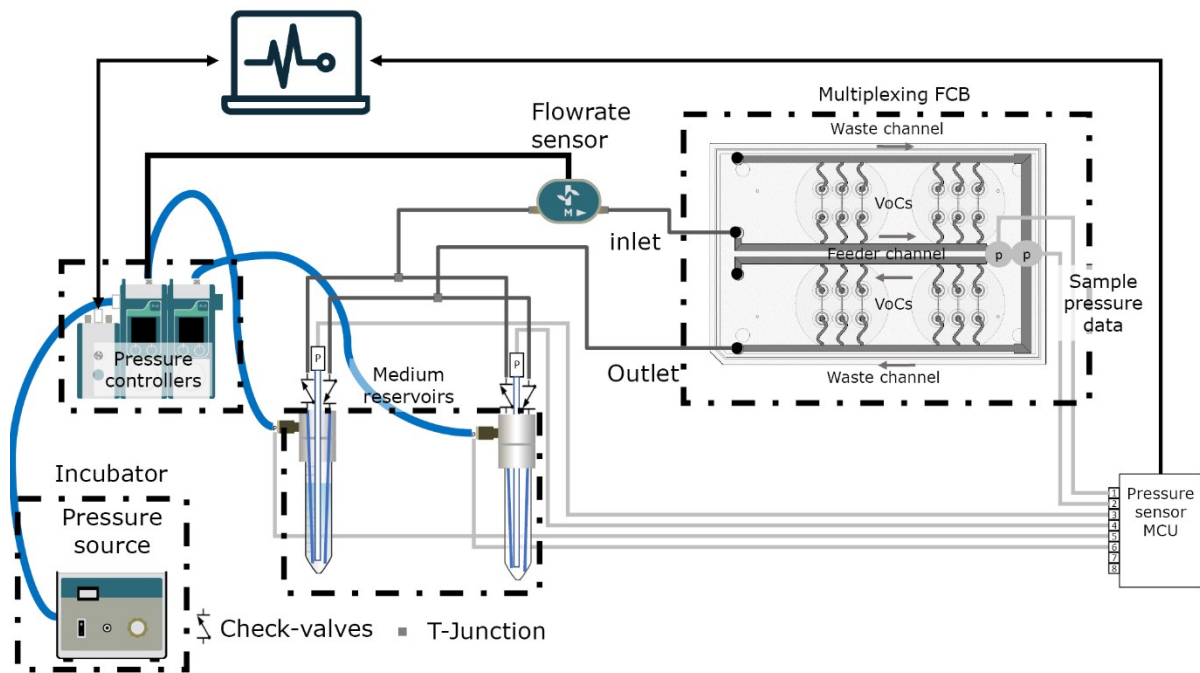

22

23 **Fig. s1** Fluidic circuit used for long-term perfusion. It requires the  
24 addition of two T or Y-connectors and results in a unidirectional flow.

25

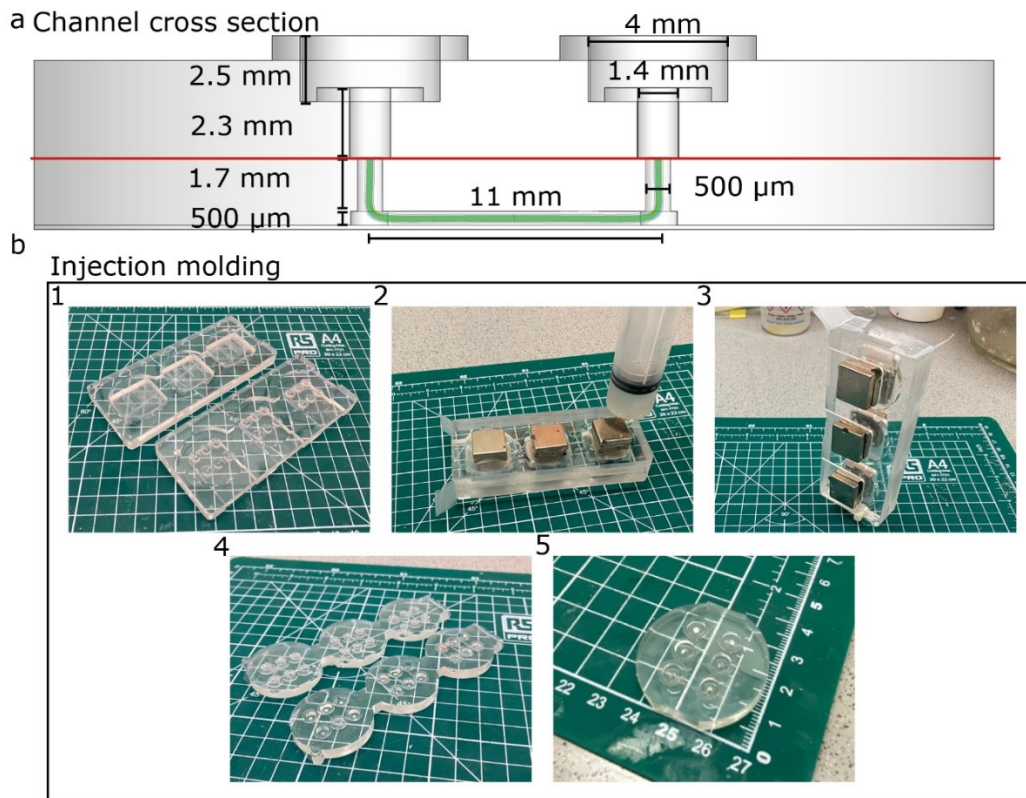

26

27 **Fig. s2 Chip design and Microfabrication using injection moulding.**

28 (a) Chip design and channel dimensions, green represents the modelled  
29 lumen, the red line indicates where the two mould halves have contact.

30 (b) Injection moulding. Two separate mould halves show the fluidic  
31 channels and medium reservoirs (1). Injection moulds are assembled  
32 using strong magnets and PDMS is injected using a syringe (2). The  
33 injection mould is placed vertically and allowed to set at room  
34 temperature for at least 16 hours (3) followed by 1 hour at 75 °C.

35 Magnets are removed and the PDMS is peeled of (4) excess PDMS is cut  
36 off (5) and the chip is assembled with air plasma treatment. (c) Defects

37 at the contact points of the injection-moulds result in small membranes of  
38 various sizes.

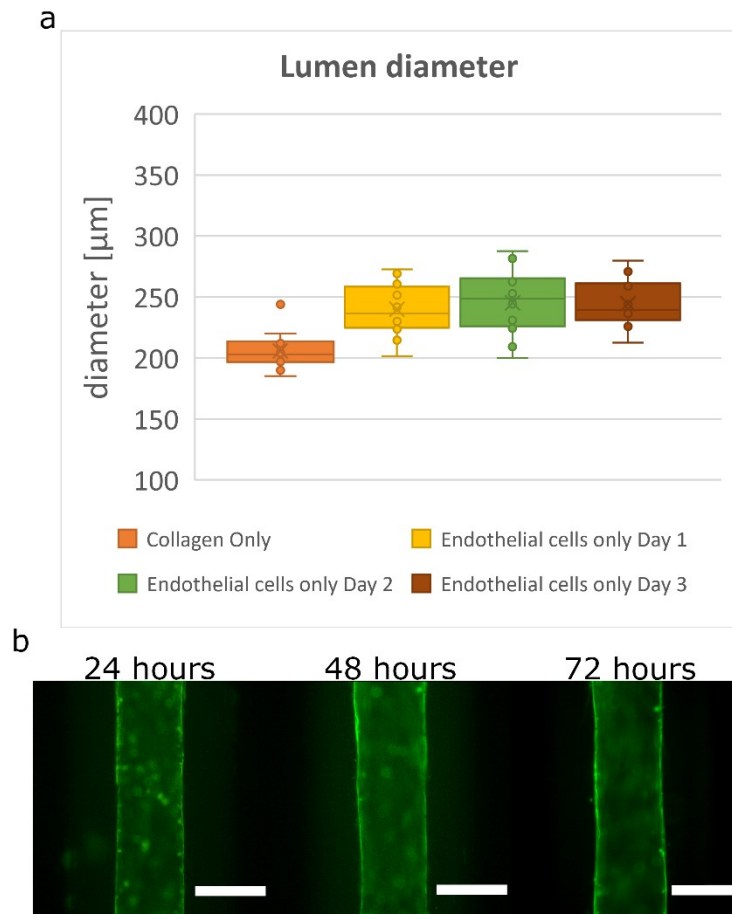

39

40 **Fig. s3** (a)Boxplot of VFP luminal diameter. Typical luminal diameter  
41 ranges of the 3D-VoC in a single experiment shows a diameter expansion  
42 after cell seeding. The seeded lumens remain constant in diameter for at  
43 least 3 days.(b) representative images of lumen at day 1, day 2 and day  
44 3. Scalebar 200 μm

45

46

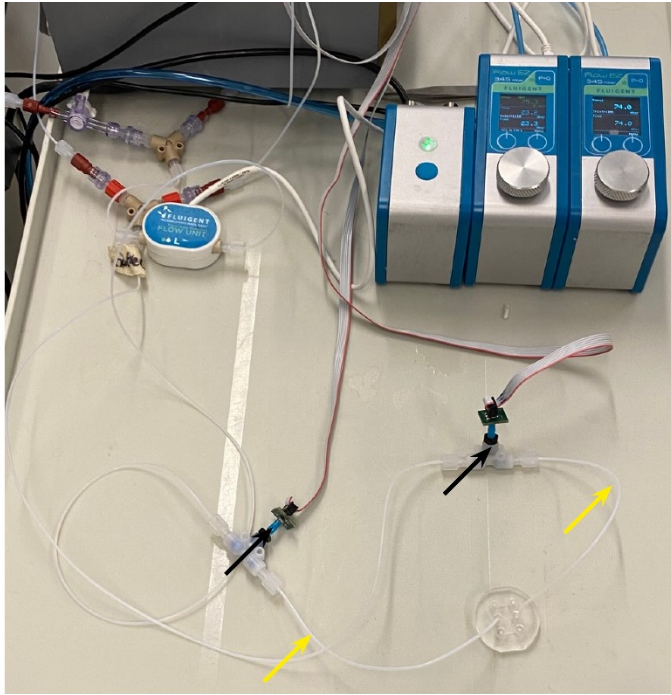

47

48 **Fig. s4** Set-up for measuring individual shear stress. A total of 52 cm of  
49 tubing (yellow arrows) was used and placed between the pressure  
50 sensors (black arrows) and the samples. The pressure difference was  
51 controlled by custom software.

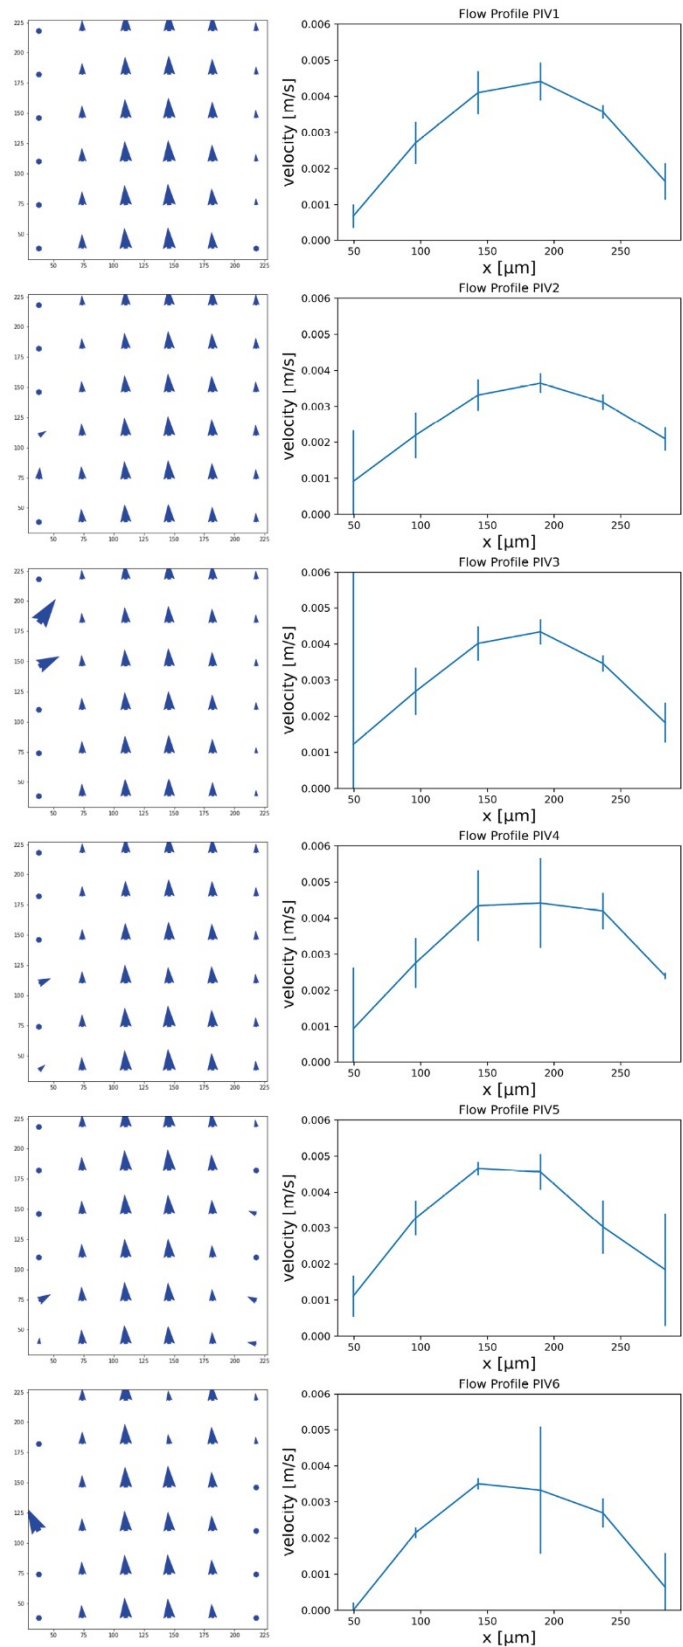

52 **Fig. s5** PIV Vector fields of all analysed samples.

53

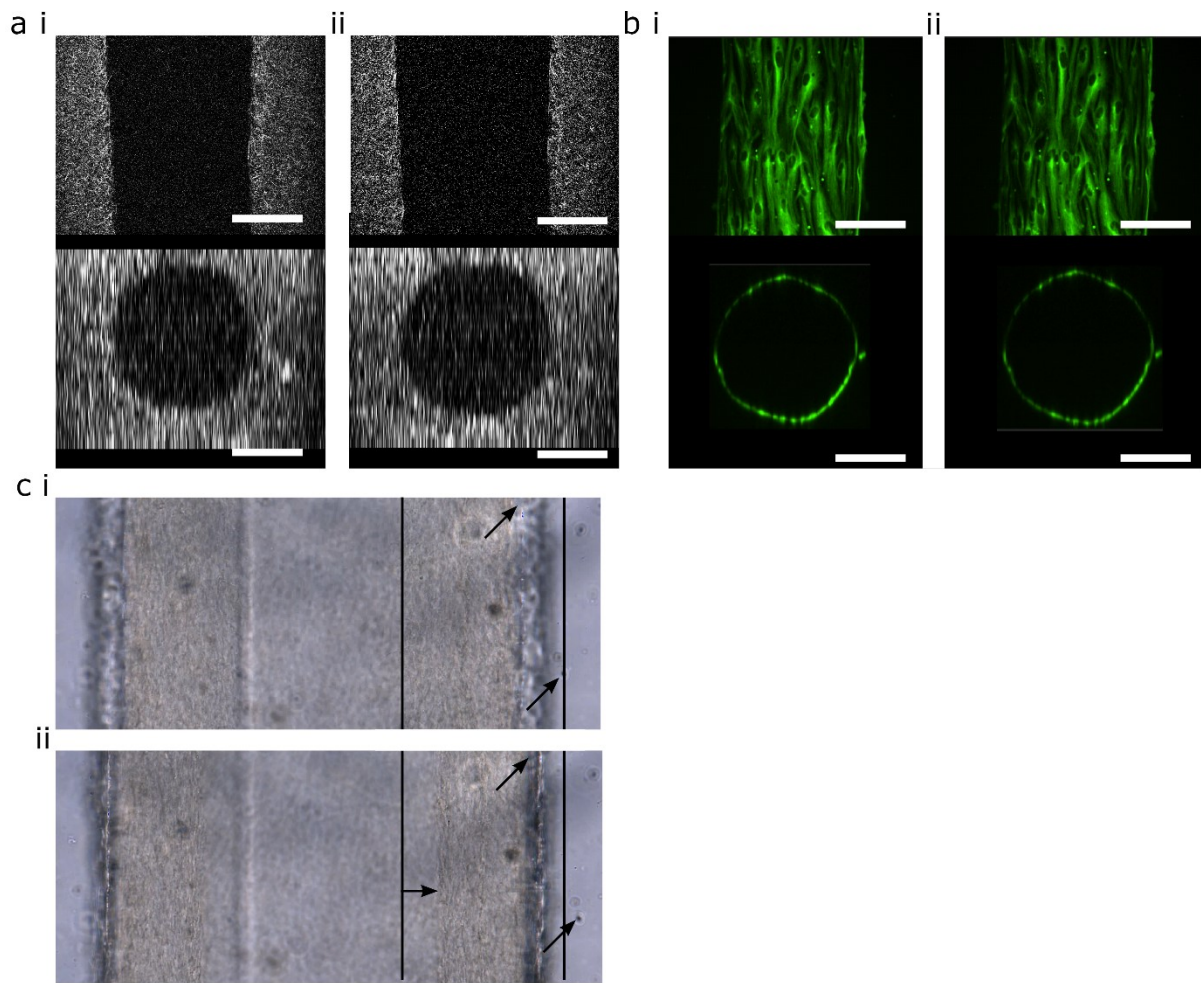

54

55 **Fig. s6** Imaging vascular compliance in 3D. (a) 2p-SHG image of the  
 56 middle frame and a cross section of the lumen at  $P = 0$  mbar (i) and  $P =$   
 57  $345$  mbar (ii), see video 3 for the animated sequence. (b) Spinning disc  
 58 confocal reconstruction bottom half of the lumen cross section of the  
 59 lumen at  $P = 0$  mbar (i) and  $P = 345$  mbar (ii), see video 4 for the  
 60 animated sequence. (c) Frames of video 2 to highlight deformation of the  
 61 lumen and the PDMS showing  $P = 0$  mbar (i) and  $P = \pm 1000$  mbar (ii).  
 62 Arrows and lines are visual references to aid comparison. Scale bars  $100$   
 63  $\mu\text{m}$ .

64

65

66

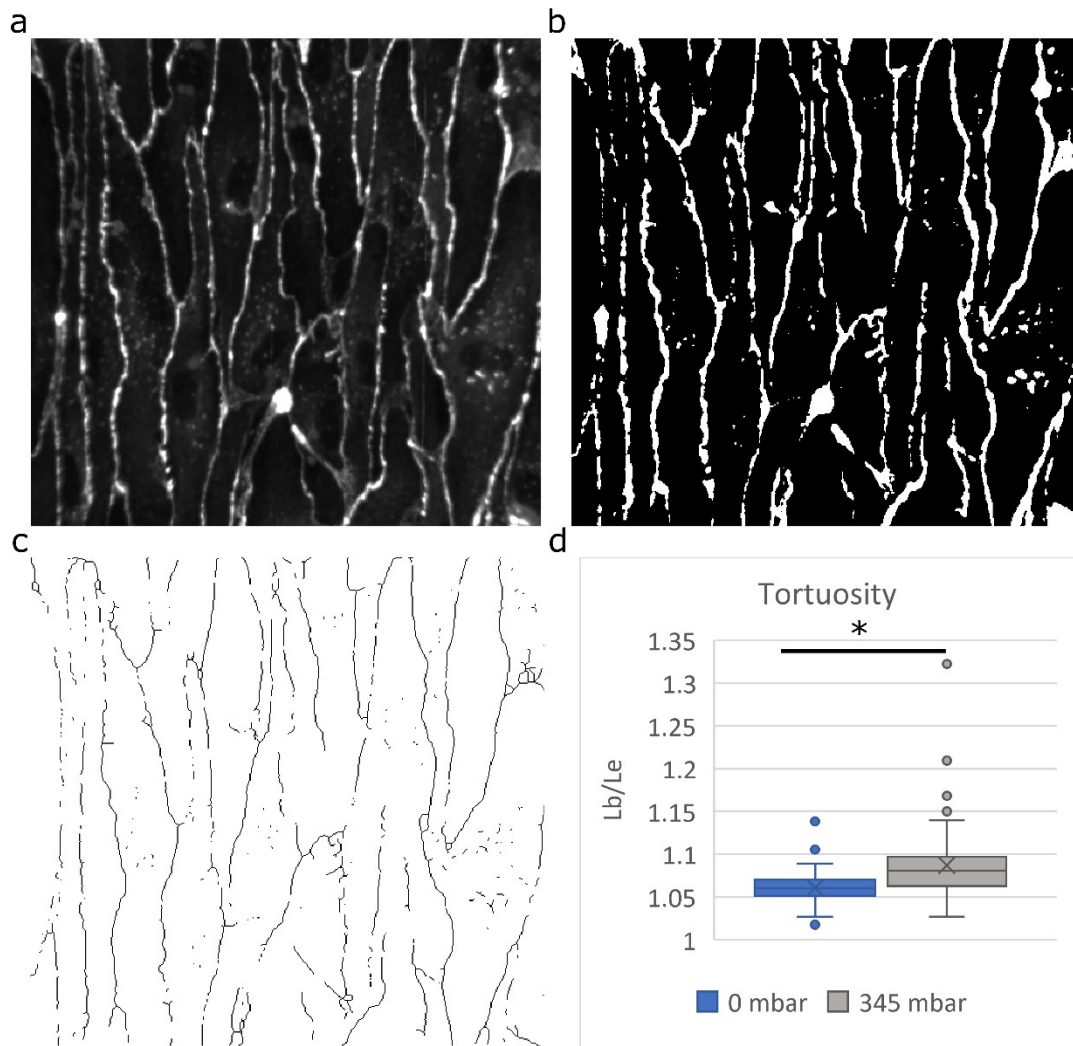

67

68 **Fig. s7** Quantification of the tortuosity index of adherens junctions (a)  
 69 Cell junctions visualized using VE-cadherin marker (b) Threshold image of  
 70 VE-cadherin (c) Skeletonized image of VE-cadherin (d) tortuosity index is  
 71 calculated by dividing the length of branch (Lb) by the Euclidean distance  
 72 of that branch(Le). Quantification based on one sequence, one point is  
 73 one cell junction\* indicates P<0.001

74

75

76



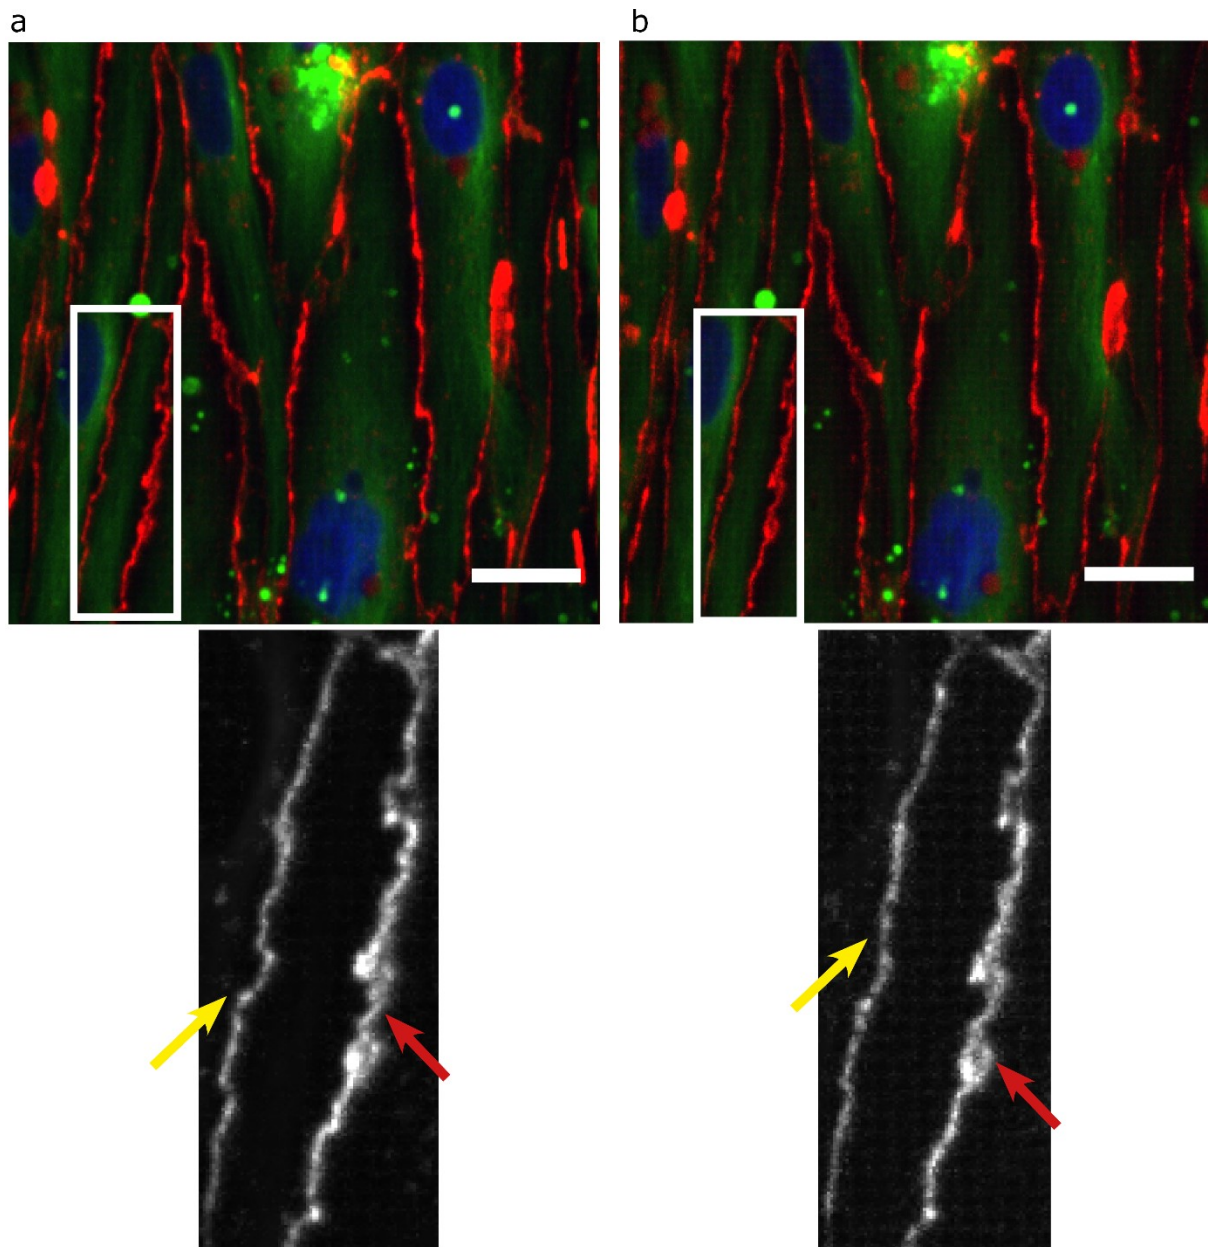

77

78 **Fig. s8** Confocal reconstruction of live TUBA1B-eGFP-ECs (green) co-  
 79 stained for adherens junctional marker (VE-cadherin, in red) and nuclei  
 80 (Hoechst, in blue) at high pressure (345 mbar) (a) and at low pressure  
 81 (0 mbar) (b). Inserts give example of morphological changes in VE-  
 82 cadherin cell junctions at high and low pressure. Borders go back to a  
 83 straight line (yellow arrows) dislocated junctions remain jagged (red  
 84 arrows). Scale bar 20 $\mu$ m.

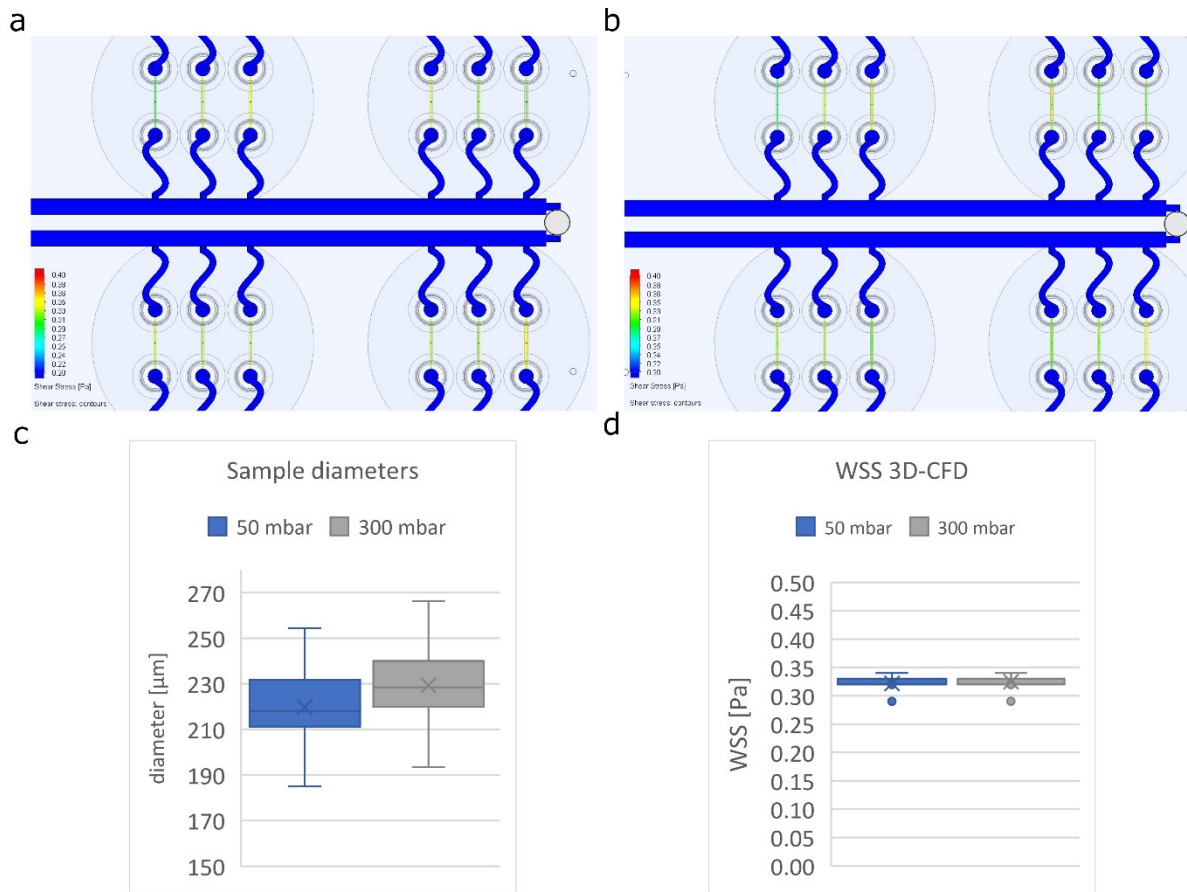

85

86 **Fig. s9** CFD model of perfusion experiment (a) with an internal pressure  
 87 of 50 mbar of internal pressure (b) with 300 mbar of internal pressure (c)  
 88 Boxplot of all sample diameters at specified internal pressure (d) Boxplot  
 89 of resulting WSS at specified internal pressure.

90 **Supplementary Videos**

91 **Video 1** Animation of 3D-CFD model showing the velocity stream lines.

92 **Video 2** Brightfield scaffold only. Pressure was manually applied using a  
93 syringe up to 1 bar.

94 **Video 3** 2p-SHG sequence of scaffold only of pressure ramp. Frame 1, P  
95 = 0 mbar; frame 2, P = 345 mbar.

96 **Video 4** 3D-Confocal sequence of the TUB1a-mGFP-hiPSC-ECs pressure  
97 ramp. Frame 1, P = 0 mbar; frame 2, P = 345 mbar.

98 **Video 5** Brightfield pressure ramp of the TUB1a-mGFP-hiPSC-ECs  
99 monolayer. P = 0-345 mbar, 25 mbar pressure increment per frame, last  
100 frame returns to P = 0 mbar.

101 **Video 6** Widefield fluorescent signal of the TUB1a-mGFP-hiPSC-ECs  
102 monolayer analysed using the VasoTracker software (blue lines).

103 **Video 7** Confocal reconstruction of pressure ramp. P = 0-50-75-100  
104 mbar. Green: TUB1a-mGFP-hiPSC-ECs, red: VE-Cadherin, blue: Hoechst.  
105 Histograms of the red channel were equalized per frame for the  
106 reconstruction. Note: last frame shows that the VE-cadherin signal is  
107 completely lost due to photobleaching of the fluorophore.

108 **Video 8** Confocal reconstruction of pressure ramp. Frame 1, P = 0 mbar;  
109 frame 2, P = 150 mbar; frame 3, P = 345 mbar, frame 4, P = 325 mbar  
110 with 1 Pa of WSS. Green: TUB1a-mGFP-hiPSC-ECs, red: VE-Cadherin,  
111 blue: Hoechst.

112 **Deriving the equation of optimum resistance of the branch**  
 113 **channels to minimize wall shear stress**

114 Hagen–Poiseuille’s law for pressure driven flow:

$$\Delta P = R_h Q$$

115 Eq. s1

116 Pressure difference for a serial connected resistance:

$$\Delta P = Q (R_h^{vessel} + R_h^{\tau EQ})$$

118 Eq. s2

119 WSS for circular lumen with given diameter and flowrate

$$\tau = \frac{32 \mu Q}{\pi d^3}$$

120 Eq. s3

121 Rewrite to flowrate for given diameter and WSS

$$Q = \frac{\tau \pi d^3}{32 \mu}$$

122 Eq. s4

123 Combine Eq. s4 in Eq. s2 with  $R_h$  for a circular 3D-VoC assuming uniform  
 124 diameter of the sample, negligible interstitial flow

$$\Delta P = \left( \frac{\tau \pi d^3}{32 \mu} \right) \left( 128 \mu \frac{l_{vessel}}{\pi d^4} + R_h^{\tau EQ} \right)$$

125 Eq. s5

126 Set WSS  $d_{min}$  equal to WSS  $d_{max}$  given equal dP (Eq. s6)

$$\left( \frac{\tau \pi d_{min}^3}{32 \mu} \right) \left( 128 \mu \frac{l_{min}}{\pi d_{min}^4} + R_h^{\tau EQ} \right) = \left( \frac{\tau \pi d_{max}^3}{32 \mu} \right) \left( 128 \mu \frac{l_{max}}{\pi d_{max}^4} + R_h^{\tau EQ} \right)$$

127

128 Eq. s6 can be reduced to Eq. s7

$$\frac{4 l_{min}}{d_{min}} + \left( \frac{\pi d_{min}^3}{32 \mu} \right) R_h^{\tau EQ} = \frac{4 l_{max}}{d_{max}} + \left( \frac{\pi d_{max}^3}{32 \mu} \right) R_h^{\tau EQ}$$

129

130 Optimal  $\tau EQ$  resistance can then be expressed in terms of sample  
 131 diameters

$$R_h^{\tau EQ} = \frac{128 \mu \left( \frac{l_{min}}{d_{min}} - \frac{l_{max}}{d_{max}} \right)}{\dots}$$

132 Eq. s8

133  $\tau$ EQ resistor dimensions of a rectangular channel:

$$134 \quad \frac{l_{resistor}}{h} = \frac{32 \left( \frac{l_{min}}{d_{min}} - \frac{l_{max}}{d_{max}} \right)}{3\pi(d_{min}^3 - d_{max}^3)} \quad \text{Eq.s9}$$

135  $\tau$ EQ resistor dimensions of a circular tube:

$$136 \quad \frac{l_{res}}{d} = \frac{\left( \frac{l_{min}}{d_{min}} - \frac{l_{max}}{d_{max}} \right)}{3\pi(d_{min}^3 - d_{max}^3)} \quad \text{Eq.s10}$$

137 **Deriving equation: Required  $\Delta P$  for given WSS**

138 Serie circuit of sample and  $\tau$ EQ resistor combined with Eq. s4

$$139 \quad \Delta P = \left( \frac{\tau \pi d^3}{32\mu} \right) \left( 128 \mu \frac{L_{vessel}}{\pi d^4} + 12\mu \frac{L}{8wh^3(1-0.63\frac{h}{w})} \right) \quad \text{Eq. s5}$$

$$140 \quad \Delta P = \left( \frac{\tau 4L_{vessel}}{d} + \frac{\tau 12 \pi d^3 L}{8wh^3(1-0.63\frac{h}{w})} \right)$$

$$141 \quad \Delta P = \tau \left( 4 \frac{L_v}{d} + \frac{3 \pi d^3 L_{res}}{8wh^3(1-0.63\frac{h}{w})} \right) \quad \text{Eq. 1}$$

142

143 **Equations wall shear stress used for Fig. 2c**

144 **Fixed Q red plot:**

$$145 \quad \tau = \frac{32 \mu Q}{\pi d^3} \quad \text{Eq.s3}$$

146  $\tau$ : WSS

147 Q: flowrate = 90  $\frac{\mu l}{min}$

148  $\mu$ : viscosity= 0.79 Pa s

149 d: diameter range= 180-300  $\mu m$

150

151

152

153 **Fixed P (green plot):**

$$\tau = \frac{\Delta P d}{4 l_{vessel}}$$

154

Eq. s11

155  $\Delta P$ : Fixed pressure difference= 237 [Pa]

156 d: Diameter range= 180-300  $\mu\text{m}$

157 l:length =1.43 cm

158  **$\tau$ EQ + Fixed  $\Delta P$  blue plot:**

$$\tau = \frac{\Delta P}{\left(4 \frac{l_{vessel}}{d} + \frac{3\pi d^3 L_{res}}{8wh^3(1 - 0.63 \frac{h}{w})}\right)}$$

159

Eq. s12

160 Fixed  $\Delta P$ : 333 [Pa]

161 d:diameter range= 180-300  $\mu\text{m}$

162 l=1.43 cm

163  $L_{res}, w, h$ = dimensions of resistor listed in table s1 [m]

164 **Table s1 channel dimensions FCB**

165

166

167

168

169

170

171

172

173

174

175

|                     |               |                        |                                    | Viscosity<br>[Pa s]              | 7.90E-04 |
|---------------------|---------------|------------------------|------------------------------------|----------------------------------|----------|
| FCB dimensions      | Length<br>[m] | Width<br>[m]           | Height<br>[m]                      | $R_h$<br>[Pa s m <sup>-3</sup> ] |          |
| Feeder channel      | 0.2           | 0.0025                 | 0.002                              | 1.90E+08                         |          |
| Feeder loop         | 0.01          | 0.0012                 | 0.002                              | 4.40E+07                         |          |
|                     |               |                        | Total                              | 2.34E+08                         |          |
| Waste channel       | 0.2           | 0.0025                 | 0.002                              | 1.90E+08                         |          |
| Waste loop          | 0.082         | 0.0035                 | 0.002                              | 4.33E+07                         |          |
|                     |               |                        | Total                              | 2.34E+08                         |          |
| $\tau$ EQ-Resistors | 0.0171        | 0.001                  | 0.0002                             | 2.32E+10                         |          |
| 3D-VoC              | length<br>[m] | d<br>[ $\mu\text{m}$ ] | $R_h$ including<br>chip resistance |                                  |          |
| Small               | 0.0143        | 180                    | 4.38E+11                           |                                  |          |
| Medium              | 0.0143        | 240                    | 1.39E+11                           |                                  |          |
| Large               | 0.0143        | 300                    | 5.68E+10                           |                                  |          |

176 **Table s2 Dimensions lumen expansion**

177

178

179

180

|                                | Scaffold-only |      | EC-monolayer |      |
|--------------------------------|---------------|------|--------------|------|
|                                | p0            | p345 | p0           | p345 |
| Pressure [mbar]                |               |      |              |      |
| Lumen width [ $\mu\text{m}$ ]  | 200           | 220  | 196          | 206  |
| Lumen height [ $\mu\text{m}$ ] | 195           | 215  | 197          | 208  |
| Ratio (w/h)                    | 1.03          | 1.02 | 0.99         | 0.99 |
